# 1 Gut microbiota structure differs between honey 2 bees in winter and summer

3

4 Lucie Kešnerová<sup>\*1</sup>, Olivier Emery<sup>\*1</sup>, Michaël Troilo<sup>1</sup>, Joanito Liberti<sup>1,2</sup>, Berra Erkosar<sup>2\*</sup>,  
5 Philipp Engel<sup>1\*\*</sup>

6

7 <sup>1</sup>Department of Fundamental Microbiology, University of Lausanne, CH-1015 Lausanne,  
8 Switzerland

9 <sup>2</sup>Department of Ecology and Evolution, University of Lausanne, CH-1015 Lausanne,  
10 Switzerland

11

12 \*equal contribution between adjacent authors

13

14 †Correspondence:

15 Prof. Philipp Engel

16 Department of Fundamental Microbiology

17 University of Lausanne, CH-1015 Lausanne, Switzerland

18 Tel.: +41 (0)21 692 56 12

19 e-mail: philipp.engel@unil.ch

20

21 Keywords: *Bartonella*, *Lactobacillus*, *Commensalibacter*, *Apis mellifera*, diutinus bees,  
22 pollen diet, seasonality

23 Running title: Microbiota of summer and winter bees

## 24 **Abstract**

25 Adult honey bees harbor a specialized gut microbiota of relatively low complexity. While  
26 seasonal differences in community composition have been reported, previous studies have  
27 focused on compositional changes rather than differences in absolute bacterial loads.  
28 Moreover, little is known about the gut microbiota of winter bees, which live much longer  
29 than bees during the foraging season, and which are critical for colony survival. We  
30 quantified seven core members of the bee gut microbiota in a single colony over two years  
31 and characterized the community composition in 14 colonies during summer and winter.  
32 Our data shows that total bacterial loads substantially differ between foragers, nurses, and  
33 winter bees. Long-lived winter bees had the highest bacterial loads and the lowest  
34 community  $\alpha$ -diversity, with a characteristic shift towards high levels of *Bartonella* and  
35 *Commensalibacter*, and a reduction of opportunistic colonizers. Using gnotobiotic bee  
36 experiments, we show that diet is a major contributor to the observed differences in  
37 bacterial loads. Overall, our study reveals that the gut microbiota of winter bees is  
38 remarkably different from foragers and nurses. Considering the importance of winter bees  
39 for colony survival, future work should focus on the role of the gut microbiota in winter  
40 bee health and disease.

41

## 42 Introduction

43 The European honey bee, *Apis mellifera*, is an important pollinator species for natural  
44 ecosystems and agricultural production [1]. Its health status is threatened by numerous  
45 factors including habitat loss, pesticide exposure, and high parasite and pathogen loads [2–  
46 4]. Accumulating evidence suggests that the gut microbiota of adult honey bees plays a  
47 critical role for bee health [5]. The bee microbiota converts dietary compounds [6, 7] and  
48 produces short chain fatty acids [8] in the gut, enhances sucrose responsiveness of the host  
49 [8], and stimulates the immune system [9, 10]. Moreover, disruption of the gut microbiota  
50 composition by antibiotic treatment, pesticide exposure, or dietary manipulations has  
51 been associated with increased pathogen loads resulting in increased host mortality [11–  
52 14].

53 A striking feature of the honey bee gut microbiota is its low taxonomic complexity. In  
54 worker bees, the community is dominated by less than ten phylotypes (i.e. clusters of  
55 strains sharing  $\geq 97\%$  sequence identity in the 16S rRNA gene), which typically make up  
56  $>95\%$  of the bacterial cells in the gut [5, 15–18]. These phylotypes have been consistently  
57 detected in honey bees, regardless of geographic location, life stage, or season [16, 19, 20],  
58 and are acquired horizontally through contact with nest mates and hive components [21].  
59 They include five core phylotypes (*Gilliamella*, *Snodgrassella*, *Lactobacillus* Firm-4 and  
60 Firm-5, and *Bifidobacterium*), which are typically present in every adult worker bee, and a  
61 number of non-core phylotypes, e.g. *Frischella*, *Bartonella*, *Commensalibacter*, or  
62 *Bombella*, which are prevalent across colonies, but not necessarily present in every bee  
63 [22]. Additional phylotypes have been detected, including *Lactobacillus kunkeii*, *Serratia*

64 *marcescens* and other Enterobacteriaceae, or *Apibacter*, but they typically account for a  
65 relatively small proportion of the bee gut microbiota [23].

66 While many of these phylotypes are consistently present in adult worker bees, their  
67 abundance can vary across bees, and may differentially impact the host physiology.  
68 Particularly, the type and amount of nutrients (i.e. pollen and nectar) available during the  
69 foraging season can have profound effects on the composition of the gut microbiota and  
70 may alter its metabolic activity [24]. Likewise, distinct dietary habits or variation in lifespan  
71 of worker bees during summer and winter may influence gut microbiota composition. From  
72 spring to autumn, young worker bees (nurses) stay inside the hive to take care of larvae,  
73 and feed on nutrient-rich pollen, whereas older worker bees become foragers that feed on  
74 nectar and honey to fuel their energy-expensive flights [25]. In late autumn, newly emerged  
75 adult worker bees become winter bees (also called ‘diutinus’) that have an extended  
76 lifespan (~6 months) and that ensure the colony survival during the cold winter season in  
77 the absence of brood [26]. These bees form a tight cluster for thermoregulation inside the  
78 hive, feed strictly on food stores (pollen, beebread, and honey) and retain their feces all  
79 winter [27], which is likely to impact the ecology of their gut microbiota.

80 A number of studies have looked at the gut microbiota composition of different worker bee  
81 types or throughout seasons, with the overall conclusion that the community composition  
82 is relatively stable [19, 28–31]. However, previous studies were mostly based on  
83 comparative analyses of relative community member abundance using 16S rRNA amplicon  
84 sequencing. Such analysis cannot provide insights about the extent or directionality of  
85 changes in taxa abundance, especially if microbial loads vary substantially between  
86 samples [32]. In fact, a change in the total abundance of the microbiota could by itself be

87 an important characteristic of different bee types (e.g. foragers, nurses, winter bees),  
88 season, or environmental exposure. An example is the experimental exposure of bees to  
89 antibiotics which did not result in a strong shift in the relative composition, but in an overall  
90 reduction of bacterial load, rendering bees more susceptible to pathogen invasion [11]. In  
91 addition to the limitations of current studies using relative abundance data, almost nothing  
92 is known about the gut microbiota of winter bees as compared to foragers or nurses. This  
93 is surprising, as winter bees are critical for colony health and survival during the cold season  
94 of the year, when resources are limited and most colony losses occur [33, 34].

95 Characterizing the gut microbiota of winter bees and identifying factors that shape its  
96 community composition may help to understand the physiological adaptations that honey  
97 bees need to survive the cold season in temperate regions. In this study, we used qPCR and  
98 16S rRNA gene amplicon sequencing to assess differences in the gut microbiota of nurses,  
99 foragers, and winter bees. We analyzed bacterial loads of major community members in  
100 566 individual worker bees sampled from a single hive over two years. We then expanded  
101 our analysis to the entire community and analyzed pooled samples from 14 different hives  
102 to test if similar community changes occur in winter bees across hives. Finally, we  
103 performed experiments with gnotobiotic bees to test the influence of diet on differences  
104 in gut microbiota composition. Our study reveals major differences in total bacterial load  
105 and in the abundance of specific gut community members in the gut microbiota of nurses,  
106 foragers, and winter bees and identifies dietary pollen as a major contributing factor.

## 107 **Materials and Methods**

### 108 **Sampling of honey bees**

109 Over a period of two years, we sampled ~24 adult worker bees of *A. mellifera* each month  
110 from a single hive located on the Dorigny campus of the University of Lausanne,  
111 Switzerland. These bees were used to determine seasonal changes in the absolute  
112 abundance of seven major community members of the honey bee gut microbiota using  
113 qPCR. During the foraging season, we sampled foragers returning to the hive entrance with  
114 pollen on their legs, while during the cold winter months, we sampled winter bees on top  
115 of the frames from inside the hive. Each sampling time point took place at the middle of  
116 each month (+/- 3 days) between April 2015 and April 2017. Samples from July 2015 were  
117 not included in the analysis due to an error that occurred during DNA extraction.

118 To identify changes in gut microbiota composition between adult worker bees in summer  
119 (i.e. nurses and foragers) and in winter (i.e. winter bees) across colonies, we sampled bees  
120 from 14 different hives. Eleven hives were located on the Dorigny campus of the University  
121 of Lausanne, and three hives were located in the village of Yens, about 17 km away.  
122 Foragers and nurses were sampled in July 2017 and August 2018, and winter bees were  
123 sampled in January 2018 and January 2019. Nurses and winter bees were collected inside  
124 the hive in the center of the colony. Foragers were collected outside the hive at the same  
125 time point as nurses. The bees sampled in July 2017 and January 2018 were used for gut  
126 content visualization and correlation of gut weight and 16S rRNA gene copy numbers. The  
127 guts of the bees sampled in August 2018 and January 2019 were pooled (20 guts per bee  
128 type per hive) and used to monitor the abundance of individual community members by  
129 qPCR and to determine the overall community structure by 16S rRNA community analysis.  
130 Bees were anesthetized with CO<sub>2</sub> for 10 s and the gut including crop, midgut, hindgut, and  
131 malpighian tubules carefully removed using sterile forceps. For the monthly sampling of

132 the single bee hive, each gut sample was placed in a drop of PBS, scored for the scab  
133 phenotype [35], and placed in a bead beating tube containing ~150 mg of glass beads (0.75-  
134 1 mm in diameter, Carl Roth) and 750  $\mu$ L of CTAB lysis buffer (0.2 M Tris-HCl, pH 8; 1.4 M  
135 NaCl; 0.02 M EDTA, pH 8; 2% CTAB, w/v, dissolved at 56°C overnight; 0.25%  $\beta$ -  
136 mercaptoethanol, v/v). For the sampling of the 14 colonies in August 2018 and January  
137 2019, the dissected guts were pooled into a single Falcon tube (14 hives x 3 bee types = 42  
138 pooled samples). Tubes were flash frozen in liquid nitrogen and stored at -80°C until DNA  
139 extraction.

140

#### 141 **Experimental colonization of honey bees**

142 Microbiota-depleted bees were generated and colonized as described in Kešnerová et al.  
143 [6]. The treatment group of bees fed on pollen and sugar water was the same as in the  
144 previous study. The other treatment group (bees fed on sugar water only) was carried out  
145 in parallel with the same batch of bees. Bees were fed *ad libitum* with sterilized bee pollen  
146 (P) and sterilized sugar water (SW, 50% sucrose, w/v) (SW+P treatment), or with only  
147 sterilized sugar water (SW treatment). Bees were sampled 10 days after colonization and  
148 the guts were dissected as described before.

149

#### 150 **DNA extraction from honey bee gut tissue**

151 A previously established CTAB/phenol-based extraction protocol [6] was used to extract  
152 DNA from individual guts. At the end of the protocol, the precipitated dried pellet was  
153 resuspended in 200  $\mu$ L and split into two samples of 100  $\mu$ L each. One sample was processed

154 with the Nucleospin PCR Clean-up kit (Macherey-Nagel, Germany) according to the  
155 manufacturer's instructions and the resulting DNA was used for qPCR. For the pooled gut  
156 samples, 2 ml of glass beads and 15 ml of CTAB lysis buffer were added to each Falcon tube.  
157 Samples were then homogenized in a Fast-Prep24™5G homogenizer at 6 m/s for 40 s,  
158 briefly centrifuged, and an aliquot of 750 µl corresponding to the sample volume of one  
159 bee gut was transferred to a new 2 ml bead beating tube with glass beads and homogenized  
160 again. All further steps of the DNA extraction were performed as previously described [6].

161

#### 162 **Quantitative PCR (qPCR) to determine absolute abundance of community members**

163 Bacterial absolute abundances were determined using qPCR assays targeting the 16S rRNA  
164 gene of either specific community members or universally all bacteria, and normalized to  
165 the number of host actin gene copies, as described in Kešnerová et al. [6].

166 Standard curves were performed on serial dilutions containing known quantities of plasmid  
167 DNA encoding the target sequence as follows: The plasmid copy number was calculated  
168 based on the molecular weight of the plasmid and the DNA concentration of the purified  
169 plasmid. Dilutions containing  $10^1$ – $10^7$  plasmid copies per µl were used to generate the  
170 standard curves. For *Frischella*, *Snodgrassella*, *Bartonella*, *Lactobacillus* Firm4, and  
171 *Lactobacillus* Firm5, the slope and intercept of the standard curve was calculated based on  
172 the Cq values (quantification cycle [36]) obtained from the dilutions containing  $10^2$  -  $10^7$   
173 plasmid copies. For these targets, the Cq value corresponding to  $10^2$  copies was set as the  
174 limit of detection (LOD) of the primer set, because dilutions containing  $10^1$  copies resulted  
175 in Cq values which could not be discriminated from the water control, or the signal was  
176 undetected. For all other targets (*Gilliamella*, *Bifidobacterium*, and actin), the slope and



177 intercept of the standard curve was calculated based on the Cq values obtained from all  
178 seven dilutions, and the Cq value corresponding to  $10^1$  copies was used as the LOD.  
179 Bacterial targets resulting in Cq values higher than the LOD of a given primer pair were  
180 considered to be too low to be quantified in the respective sample (i.e.  $<10^2$  or  $<10^1$  copies  
181 per  $\mu\text{l}$ ). The *Efficiency of primers (E)* was estimated from the slope according to the  
182 equation:  $E = 10^{(-1/\text{slope})}$  [37]. Primer characteristics and their performance are summarized  
183 in **Table S1**.

184 One individual gut sample had to be excluded from the analysis, because it gave no  
185 amplification for any of the bacterial targets and very low amplification for actin. For all  
186 other samples we determined the number of bacterial genome equivalents per gut as a  
187 proxy for bacterial abundance as follows: We first calculated the 'raw' copy number ( $n_{\text{raw}}$ )  
188 of each target in 1  $\mu\text{l}$  of DNA (the volume used in each qPCR reaction) based on the Cq value  
189 and the standard curve using the formula  $n_{\text{raw}} = E^{(\text{intercept} - \text{Cq})}$  [38]. Then, we normalized the  
190 'raw' copy number by dividing by the number of actin gene copies present in the sample  
191 ( $n_{\text{actin}}$ ), which was determined using the same formula. This normalized value of 16S rRNA  
192 gene copies was then multiplied by the median number of actin gene copies of the samples  
193 of a given dataset and the total volume of extracted DNA (i.e. 200  $\mu\text{l}$ ) to obtain normalized  
194 copy numbers per gut ( $n_{\text{abs}}$ ):  $n_{\text{abs}} = (n_{\text{raw}}/n_{\text{actin}}) \times \text{median}(n_{\text{actin}}) \times 200$ . Normalization with the  
195 actin gene was done to reduce the effect of gut size variation and the DNA extraction  
196 efficiency. To report the number of genome equivalents ( $n_{\text{GE}}$ ) rather than the normalized  
197 16S rRNA gene copy number, we divided  $n_{\text{abs}}$  by the number of 16S rRNA loci present in the  
198 genome of the target bacterium (as listed in **Table S1**). For the qPCR results obtained with  
199 the universal bacterial primers, we reported the absolute 16S rRNA gene copies ( $n_{\text{abs}}$ )  
200 rather than genome equivalents ( $n_{\text{GE}}$ ), as the number of 16S rRNA gene loci differs between

201 bacteria.

202

### 203 **16S rRNA gene amplicon sequencing**

204 The V4 region of the 16S rRNA gene was amplified as described in the Illumina 16S

205 metagenomic sequencing preparation guide

206 ([https://support.illumina.com/documents/documentation/chemistry\\_documentation/16](https://support.illumina.com/documents/documentation/chemistry_documentation/16)

207 [s/16s-metagenomic-library-prep-guide-15044223-b.pdf](https://support.illumina.com/documents/documentation/chemistry_documentation/16)) using primers 515F-Nex

208 (TCGTCGGCAGCGTCAGATGTGTATAAGAGACAGGTGCCAGCMGCCGCGGTAA) and 806R-Nex

209 (GTCTCGTGGGCTCGGAGATGTGTATAAGAGACAGGGACTACHVGGGTWTCTAAT), which

210 contain the adapter sequences for Nextera XT indexes and the primers for the V4 region of

211 the 16S rRNA gene [39]. PCR amplifications were performed in a total volume of 25 µl, using

212 12.5 µl of Invitrogen Platinum SuperFi DNA Polymerase Master Mix, 5 µl MilliQ water, 2.5

213 µl of each primer (5 µM), and 2.5 µl of template DNA. PCR conditions were set to 98°C for

214 30 s followed by 25 cycles of 98°C for 10 s, 55°C for 20 s and 72°C 20 s, and by a final

215 extension step at 72°C for 5 min. Amplifications were verified by 2% agarose gel

216 electrophoresis. The PCR products were next purified using Clean NGS purification beads

217 (CleanNA) in a 1:0.8 ratio of PCR product to beads, and eluted in 27.5 µl of 10 mM Tris pH

218 8.5. Next, we performed a second PCR step to add unique dual-index combinations to each

219 sample using the Nextera XT index kit (Illumina). Second-step PCR amplifications were

220 performed in a total volume of 25 µl using 2.5 µl of the PCR products, 12.5 µl of Invitrogen

221 Platinum SuperFi DNA Polymerase Master Mix, 5 µl MilliQ water, and 2.5 µl each of Nextera

222 XT index primers 1 and 2. Thermal cycle conditions were an initial denaturation step at 95°C

223 for 3 min followed by eight cycles of 30 s at 95°C, 30 s at 55°C, and 30 s at 72°C, and a final

224 extension step at 72°C for 5 min. The final libraries were purified using Clean NGS

225 purification beads in a 1:1.12 ratio of PCR product to beads, and eluted in 27.5 µl of 10 mM  
226 Tris pH 8.5. The amplicon concentrations, including the negative PCR control, were then  
227 quantified by PicoGreen and pooled in equimolar concentrations (with the exception of the  
228 negative control). We verified that the final pool was of the right size using a Fragment  
229 Analyzer (Advanced Analytical) and performed sequencing on an Illumina MiSeq  
230 sequencer, producing 2 x 250 bp reads, at the Genomic Technology Facility of the University  
231 of Lausanne.

232

### 233 **Processing of 16S rRNA gene amplicon sequencing data**

234 Divisive Amplicon Denoising Algorithm 2 (DADA2) pipeline (“dada2” package version 1.12.1  
235 in R) was used to process the sequencing data (see script ‘2\_Dada2\_Pipeline.R’ on Zenodo)  
236 [40]. All functions were ran using the recommended parameters  
237 (<https://benijneb.github.io/dada2/tutorial.html>) except for “expected errors” during the  
238 filtering step which was set to (maxEE=1,1) in “filterAndTrim” function. The SILVA database  
239 was used for taxonomy assignments. Downstream analyses were performed in R version  
240 3.6.0. Reads belonging to mitochondria, chloroplast, and eukaryotes were excluded from  
241 further analyses (“phyloseq” package version 1.28.0 [41], “subset\_taxa” function). Only  
242 reads that are present in at least two samples with a total number of 10 reads were  
243 retained for downstream analyses (“genefilter” package version 1.66.0 [42],  
244 “filterfun\_sample” function, see script ‘2\_Dada2\_Pipeline.R’ on Zenodo). To complement  
245 the taxonomic classification based on the SILVA database, sequence variants were further  
246 assigned to major phylotypes of the bee gut microbiota as defined in previous studies  
247 based on a BLASTn search against the Nucleotide (nt) database of NCBI  
248 (<https://www.ncbi.nlm.nih.gov/nucleotide/>). To analyze absolute bacterial abundances,

249 we multiplied the proportions of each taxon by the total 16S rRNA gene copy number  
250 present in each sample (as measured by qPCR using the universal bacterial primers and  
251 normalized by actin copy gene number), and divided this number by the number of 16S  
252 rRNA loci for each taxon. The mean 16S rRNA operon copy number for each taxon was  
253 obtained from a previous study [11] and completed from rrNDB  
254 (<https://rrndb.umms.med.umich.edu/>).

255

### 256 **Diversity analysis and statistics**

257 Diversity analyses were performed using “Vegan” package [43]. For both datasets, the  
258 qPCR data from the monthly sampling and the 16S rRNA gene amplicon data from the  
259 pooled samples, we measured  $\alpha$ -diversity using effective number of species [44] that is  
260 calculated by taking the exponent of Shannon’s diversity index (“diversity” function). For  
261 the 16S rRNA gene amplicon sequencing data, permutational multivariate analysis of  
262 variance (ADONIS, “adonis” function) based on Bray–Curtis dissimilarities ( “vegdist”  
263 function) [45] was used to test the effect of bee type on community structure, and  
264 “metaMDS” function was used for plotting beta-diversity (see script  
265 ‘3\_Plots\_Stats\_Figures2\_S4.R’ on Zenodo). To test the dispersion of communities we used  
266 the function “betadisper” [46, 47] and compared the distances of individual samples to  
267 group centroids in multidimensional space using “permutest”. For the qPCR data from the  
268 monthly sampling, we performed a principal component analysis (PCA) with the *prcomp*  
269 function of the R package “stats” to determine the similarity of the bacterial communities  
270 between foragers and winter bees using absolute abundance measures of the seven gut  
271 microbiota phylotypes.

272 All statistical analyses were performed using R (version 3.6.0). We tested the effect of bee  
273 type on bacterial loads, diversity indices, and wet gut weight using Student's t-test (in case  
274 of two group comparisons) or general linear models (in case of three group comparisons).  
275 Since the residuals obtained for certain models showed heteroscedasticity, we used a  
276 permutation approach (referred to as Permutation TTEST or ANOVA respectively) to test  
277 the significance of the effects as described before [48]. Briefly, we randomized the values  
278 of the response variable 10,000 times and computed the F-values/t-values for the tested  
279 effect for each randomized dataset. The p-values corresponding to the effects were  
280 calculated as the proportion of 10,000 F-values that were equal or higher than the observed  
281 one. Pairwise comparisons between different factors were performed by Tukey's HSD using  
282 "multcomp" package [49] using *glht* function on the model. P-values were adjusted using  
283 the Bonferroni method. Detailed results of statistics are reported in Supplementary tables  
284 S2-S5.  
285

## 286 Results

### 287 *Bacterial loads of core microbiota members differ between foraging and winter season* 288 *in a honey bee colony monitored over two years.*

289 To characterize the gut microbiota of adult worker bees across seasons, we tracked the  
290 total abundance of five core (*Gilliamella*, *Snodgrassella*, *Bifidobacterium*, *Lactobacillus*  
291 Firm4, and *Lactobacillus* Firm5) and two non-core members (*Frischella*, and *Bartonella*;  
292 **Table S1**) in adult worker bees from a single hive over two years. Our analyses included 566  
293 individual bee samples.

294 The core members *Gilliamella*, *Snodgrassella*, *Lactobacillus* Firm-5 and *Bifidobacterium*  
295 were present in all analyzed bees, and the core member *Lactobacillus* Firm-4 was  
296 detectable in 98.4% of all bees (**Supplementary Fig. S1A**). Notably, the two designated non-  
297 core members *Bartonella* and *Frischella* were also present at relatively high prevalence  
298 with only 5.3% and 26.9% of the samples giving signals below the detection limit,  
299 respectively (**Supplementary Figs. S1B & C**). Consistent with our previous results, *Frischella*  
300 prevalence strongly correlated with the presence of the scab phenotype (**Supplementary**  
301 **Fig. S2**), a local melanization response that is induced by *Frischella* upon colonization [35].

302 The absolute abundance of the monitored phylotypes varied little among the bees sampled  
303 at the same time point, with the exception of the non-core members *Frischella* and  
304 *Bartonella* (**Supplementary Fig. S3**). However, there were clear differences in bacterial  
305 abundances between months (Permutation ANOVA  $P=1e-4$ ) for all monitored community  
306 members. In particular, we observed remarkable differences in the bacterial loads between  
307 bees sampled during the foraging and the winter season in both years. This became evident  
308 from the abundance of individual phylotypes and from the total bacterial load inferred

309 from the summed abundances of all seven phylotypes (**Supplementary Fig. S3, Fig. 1A**).  
310 Specifically, we found a 10- to 100-fold increase in the levels of the core members  
311 *Lactobacillus* Firm-4, *Lactobacillus* Firm-5, and *Bifidobacterium*, as well as the non-core  
312 member *Bartonella* when comparing across all winter bees relative to foragers (**Fig. 1C**,  
313 Permutation T-Test  $P=1e-4$ ). We also observed a small increase of *Snodgrassella* levels in  
314 winter bees (**Fig. 1C**, Permutation T-Test  $P=6e-4$ ), but no difference in the levels of  
315 *Gilliamella* (**Fig. 1C**, Permutation T-Test  $P=0.7$ ). *Frischella* was the only member of the  
316 community that displayed the opposite trend, i.e. lower abundance in winter bees (**Fig. 1C**,  
317 Permutation T-Test  $P=1e-4$ ). The overall bacterial load was about 10x larger in winter bees  
318 than in foragers based on both the summed abundances of all seven phylotypes (**Fig. 1C**,  
319 Permutation T-Test  $P=1e-4$ ) as well as the number of total 16S rRNA gene copies, which  
320 was determined with universal 16S rRNA gene qPCR primers for a subset of the samples  
321 (**Fig. 1D**, Permutation T-Test,  $P=1e-4$ ).

322 Considering that the monitored phylotypes typically comprise the majority of the bacteria  
323 present in the honey bee gut, we neglected the possible presence of additional, non-  
324 targeted members and analyzed the relative composition of the community based on our  
325 data. In both years, the communities of winter bees were largely dominated by the  
326 phylotypes *Lactobacillus* Firm-5 and *Bartonella*. In contrast, forager bees seem to have  
327 more even community compositions (**Fig. 1B**). The dominance of *Lactobacillus* Firm-5 and  
328 *Bartonella* in winter bees was reflected by a reduction in  $\alpha$ -diversity in winter bees  
329 compared to foragers, as determined by the effective number of species (**Fig. 1E**,  
330 Permutation T-Test,  $P=1e-4$ ). Moreover, PCA revealed a clear separation between foragers  
331 and winter bees (**Fig. 1F**, MANOVA Wilks  $=0.6$   $F_{(7, 392)}=39.4$ ,  $P<2.2e-4$ ) along the principal

332 component 1 (PC1). This separation was mainly driven by *Lactobacillus* Firm-4,  
333 *Lactobacillus* Firm-5, *Bartonella* and *Bifidobacterium*, the four phylotypes with the largest  
334 differences in abundance between the two types of bees (**Fig. 1C**).

335 Taken together, these results suggest that the gut microbiota of winter bees and foragers  
336 markedly differs from each other in the monitored hive, both in terms of the total bacterial  
337 abundance and in the levels of individual microbiota members.

338

339 ***Consistent difference in bacterial loads and community composition between foragers,***  
340 ***nurses, and winter bees across colonies***

341 The observed differences in bacterial loads between foragers and winter bees in the  
342 monitored hive prompted us to check for similar patterns across 14 different hives in a  
343 subsequent year. In addition to foragers and winter bees, we also analyzed nurses, to help  
344 understand whether microbiota differences between foragers and winter bees are linked  
345 to seasonal changes or to behavioral or dietary differences. Moreover, we combined our  
346 qPCR approach with 16S rRNA gene amplicon sequencing to expand our analysis to the  
347 complete community of the honey bee gut microbiota.

348 Performing universal 16S rRNA qPCR, we found that total bacterial loads differed between  
349 the three bee types across the sampled hives. Both winter bees and nurses had higher  
350 bacterial loads than foragers (**Fig. 2A**, Permutation ANOVA  $P=1e-4$ , followed by Tukey HSD  
351 test,  $P=5.1e-9$  and  $1.66e-6$  respectively) confirming our previous results from the single  
352 hive. Winter bees also showed a trend towards higher bacterial loads than nurses, but this  
353 difference was not statistically significant (**Fig. 2A**, Permutation ANOVA followed by Tukey  
354 HSD test,  $P=0.224$ ).



355 16S rRNA amplicon sequencing yielded 70 amplicon sequence variants across the 42  
356 samples, with a minimum of 26,993 reads per sample after quality and abundance filtering  
357 (See methods and Supplementary Table S6 for details). These sequence variants were  
358 further clustered by assigning them to the major phlotypes of the bee gut microbiota as  
359 defined in previous studies, resulting in 28 operational taxonomic units (OTUs). To account  
360 for the differences in total bacterial load, we calculated absolute abundance of each OTU  
361 based on its proportion in the community, the number of rRNA loci in the genome, and the  
362 total bacterial load per sample.

363 Diversity analyses of the amplicon sequencing data revealed marked differences in  
364 community composition between the three bee types. We found a significant reduction in  
365  $\alpha$ -diversity in winter bees compared to foragers and nurses, as determined by effective  
366 number of species (ANOVA  $F(2,39) = 35.9$ ,  $p = 1.60e-9$ , Tukey HSD test  $P < 0.005$  for all  
367 comparisons, **Fig. 2B**). This indicates that gut communities in these bees are less rich and  
368 less even. Moreover, nonmetric multidimensional scaling (NMDS) based on Bray-Curtis  
369 dissimilarities revealed a significant separation of samples according to bee type indicating  
370 that the communities of nurses, foragers, and winter bees are different from each other  
371 (**Fig. 2C**). Consistently, ADONIS on Bray-Curtis dissimilarities showed a statistically  
372 significant difference according to bee type ( $P = 0.001$ ). Differences in community structure  
373 were also evident from the relative proportion of different taxa across the samples, with a  
374 clear reduction of the relative abundance of *Snodgrassella* and *Frischella* and an increase  
375 of *Bartonella* and *Commensalibacter* in winter bees relative to foragers and nurses (**Figure**  
376 **2D**). However, we did not detect any difference in community dispersal between nurses,  
377 foragers, and winter bees. Distances to group centroids based on Bray-Curtis dissimilarities  
378 were not different between bee types (Permutest  $F_{(2,39)} = 0.41$ ,  $P = 0.68$  (**Supplementary Fig.**

379 **4A)**. Therefore, while the gut communities of the three bee types differed from each other,  
380 they seemed to be similarly variable among each other.

381 We next assessed differences in the absolute abundance of individual community members  
382 to reveal the directionality of community changes. We first looked at the seven phlotypes  
383 that were monitored by qPCR over two years (**Fig. 2E**). Consistent with our previous results  
384 (**Fig. 1C**), *Bifidobacterium*, *Lactobacillus Firm4*, *Lactobacillus Firm5*, and *Bartonella* had  
385 increased levels (Permutation ANOVA on three groups  $P=1e-4$ , followed by Tukey,  $P<2e-4$ ),  
386 while *Frischella* had decreased levels in winter bees compared to foragers (**Fig. 2E**,  
387 Permutation ANOVA  $p=2e-04$  followed by Tukey HSD test  $P=2.79e-3$ ). The only two  
388 phlotypes showing abundance patterns inconsistent with the results from the two year  
389 sampling were *Snodgrassella* and *Gilliamella*. *Snodgrassella* did not experience any  
390 differences in absolute abundance (**Fig. 2E**, Permutation ANOVA  $P=1.87e-1$ ), illustrating  
391 that a proportional change in the community, as found when looking at the relative  
392 community composition (**Fig. 2D**), does not necessarily imply a change in abundance. When  
393 comparing nurses and winter bees, only *Bartonella* and *Frischella* showed differences in  
394 their absolute abundance. While *Bartonella* had markedly increased levels, *Frischella*  
395 abundance went down in winter bees as compared to nurses (**Figure 2E**). We confirmed  
396 these changes by carrying out qPCR on the same samples with the phlotype-specific  
397 primers used for the monthly sampling as presented above (**Supplementary Fig. S5**). Except  
398 for *Lactobacillus Firm5*, which showed a significant difference between nurses and winter  
399 bees in the qPCR but not in the amplicon sequencing data, the results of the two  
400 approaches were surprisingly congruent corroborating our conclusion that the microbiota  
401 of nurses, foragers, and winter bees markedly differs in the composition of these seven  
402 major community members.

403 We also looked at abundance changes of other community members than those assessed  
404 by qPCR the two-year sampling from a single hive (**Fig. 2F** and **Supplementary Fig. S4B**). As  
405 expected, other bacteria made up a relatively small fraction of the overall community (4-  
406 25%) with *Commensalibacter* being the most prevalent (100% of the pooled gut samples)  
407 and abundant one (2-14% of the community). *Commensalibacter* was also the only  
408 additional community member that showed a significant increase in winter bees compared  
409 to foragers and nurses (Permutation ANOVA  $P=1e-04$ , followed by Tukey  $P=7.68e-08$ ). In  
410 contrast, all other additional community members were only detected in a subset of the  
411 samples, and at relatively low abundance, suggesting that they represent opportunistic or  
412 transient colonizers. Moreover, many of these community members showed a trend  
413 towards lower prevalence and/or abundance in winter bees than in foragers and nurses  
414 (**Fig. 2F**). For example, while *Apibacter* was detected in all forager and nurse samples, it  
415 was only detected in five out of the 14 sampled hives in winter bees and at lower levels  
416 than in foragers and nurses (Permutation ANOVA  $P=1e-04$ , followed by Tukey HSD test  $P<2e-$   
417  $8$ ). Likewise, while *Lacotbacillus kunkeii* was detected in nurses and foragers from some  
418 hives, it was not detected in any hive during winter. These differences are likely responsible  
419 for the reduction in  $\alpha$ -diversity in winter bees as compared to foragers and nurses.  
420 Interestingly, several *Enterobacteriaceae* (*Klebsiella*, *Pantoea*, *Serratia*, or *Tatumella*) were  
421 prevalent among nurse samples but absent from nearly all foragers and winter bee samples  
422 (**Fig. 2F** and **Supplementary Fig. S4B**), suggesting a specific association of these bacteria  
423 with nurse bees.  
424 Taken together, these results show that winter bees and nurses across hives have increased  
425 bacterial loads compared to foragers, and that winter bees have particularly high levels of  
426 *Bartonella* and *Commensalibacter*, but low levels of opportunistic colonizers.

427

428 ***Pollen diet increases gut community size in gnotobiotic bees***

429 One of the drivers of the observed differences in bacterial load and community  
430 composition between winter bees, foragers, and nurses could be diet. Dietary differences  
431 between the three types of bees were evident from visual inspection of the dissected guts  
432 (**Fig. 3A-C**). The rectums of winter bees and nurses appeared yellow indicating the presence  
433 of pollen, while those of foragers were translucent. Moreover, the wet weight of the guts  
434 was significantly different between the three types of bees (ANOVA  $F_{(2,68)} = 24.13$ ,  $P=1.21e-$   
435  $8$ ), with foragers having on average two times lighter guts than nurses (Tukey HSD test  
436  $P=1.14e-6$ ) and winter bees (Tukey HSD test  $P=6.81e-8$ ) (**Fig. 3D**). When plotting normalized  
437 16S rRNA gene copy numbers as a function of gut weight, we found that gut weight  
438 positively correlated with total microbiota abundances across the three bee types (**Fig. 3E**).

439 In order to demonstrate that pollen diet is directly associated with increased bacterial loads  
440 in honey bees, we experimentally colonized newly emerged bees with a community of 11  
441 bacterial strains representing the seven major bacterial phylotypes of the bee gut  
442 microbiota [6]. The colonized bees were kept in the laboratory for ten days and fed *ad*  
443 *libitum* either sterile sugar water and pollen (SW+P treatment), or sugar water only (SW  
444 treatment). We found a significant difference in gut weight between the two treatments  
445 (**Fig. 3F**, Welch's T-Test  $t=9.433$ ,  $P=1.452e-11$ ). While the gut weights of the bees of the SW  
446 treatment were comparable to those of forager bees, the gut weights of the bees of the  
447 SW+P treatment were markedly higher, exceeding even those of winter bees (**Fig. 3D &**  
448 **3F**). We observed a positive correlation between gut weight and microbiota abundance for  
449 both the experimentally colonized bees in the laboratory (**Fig. 3G**) and the conventional

450 worker bees sampled from the hive (**Fig. 3E**). Moreover, differences in bacterial loads of  
451 individual community members between the two experimental treatments mirrored, to a  
452 large extent, the differences found between nurses, foragers, and winter bees: most  
453 phylotypes were more abundant in bees fed pollen as compared to bees fed sugar water  
454 only (**Fig. 3H**, see **Supplementary Table S4** for statistics). Two exceptions were *Bartonella*  
455 and *Frischella*. While *Bartonella* had similar levels between the two experimental  
456 treatments (**Fig. 3H**), its abundance was higher in winter bees and nurses as compared to  
457 foragers (**Fig. 2A**). Notably, *Bartonella* was able to colonize only 75% of all bees when pollen  
458 was absent. The dependence on pollen for gut colonization was even more pronounced for  
459 *Frischella*. Less than 50% of the experimentally colonized bees of the SW treatment had  
460 detectable levels of *Frischella*, and the loads in bees that were colonized were relatively  
461 low. In contrast, bees of the SW+P treatment were all colonized and had relatively high and  
462 consistent loads of *Frischella* (**Fig. 3H**).

463 Taken together, these results show that a pollen diet leads to an increase in gut weight and  
464 overall bacterial load providing a plausible explanation for some of the differences in the  
465 loads observed between foragers, nurses, and winter bees.

## 466 Discussion

467 Here, we used a combined approach of qPCR and 16S rRNA gene amplicon sequencing to  
468 show that the gut microbiota of adult worker bees markedly differs between nurses,  
469 foragers, and winter bees. Nurses and winter bees harbored a larger number of bacteria in  
470 the gut than foragers, with most of the dominant community members (except for  
471 *Frischella* and *Snodgrassella*) contributing to the increased bacterial loads. Winter bees had  
472 the lowest  $\alpha$ -diversity of the three bee types, which is explained by the presence of fewer  
473 opportunistic colonizers such as *Apibacter*, *Bombella*, or *L. kunkeii*. Moreover, a  
474 characteristic shift towards high levels of *Bartonella* and *Commensalibacter* was observed  
475 in winter bees. These differences in community structure were found across fourteen  
476 different colonies and in three different years, suggesting that the “reconfiguration” of the  
477 microbiota in winter bees is a conserved feature in colonies in Western Switzerland.

478 However, regional differences in floral diversity [24] or climate may influence this pattern.  
479 Therefore, additional surveys of winter bees in other geographic regions are needed to test  
480 for the conservation of this pattern. A recent study carried out in Germany on the effects  
481 of winter supplementation feeds found that the relative abundance of certain community  
482 members (e.g. *Lactobacillus* Firm-5 and *Bartonella*) increases in winter bees compared to  
483 foragers [19], resulting in marked community shifts. The results of this study were also  
484 consistent with our findings in that the levels of *Frischella* were significantly lower in winter  
485 bees as compared to forager bees. However, this previous study was based on relative  
486 abundance data only, i.e. 16S rRNA gene amplicon sequencing.

487 In contrast to 16S rRNA gene amplicon sequencing, qPCR provides information about the  
488 absolute abundance of bacteria and allows determining whether individual community

489 members increase, decrease, or remain the same in terms of bacterial cell number across  
490 samples. For example, in our study, the relative abundance of *Snodgrassella* went down in  
491 winter bees as compared to foragers and nurses (**Fig. 2D**). However, this effect was not due  
492 to a decrease of the total number of *Snodgrassella*, but rather an increase of other  
493 community members as identified by qPCR. In fact, the total abundance of *Snodgrassella*  
494 remained the same in foragers, nurses, and winter bees (**Fig. 2E**). Such quantitative  
495 microbiome profiling approaches can reveal important associations between gut bacteria  
496 and the host, as previously demonstrated for the human microbiota [32] or the microbiota  
497 of caterpillars [50]. We argue that absolute abundances should be routinely assessed when  
498 analyzing microbial communities, as changes in absolute abundance – but not necessarily  
499 relative abundance – may change the impact of a given bacterium on its environment.  
500 Notably, qPCR is a targeted approach, i.e. one can only quantify specific community  
501 members for which corresponding primers have been designed, or assess the total amount  
502 of bacteria using universal primers. Therefore, a combined approach of qPCR (or any other  
503 quantitative method, e.g. flow cytometry) and relative composition analysis (such 16S rRNA  
504 gene sequencing or shotgun metagenomics) is preferred, as it provides information about  
505 the quantity and directionality of changes in a microbial community.

506

507 What drives the observed changes in bacterial loads and community composition in winter  
508 bees, nurses, and foragers? A possible explanation could be dietary differences between  
509 the analyzed bee types. Foragers mainly feed on nectar and honey, while nurses and winter  
510 bees also consume pollen [51]. These dietary differences were also evident in our study, as  
511 we found consistent changes in appearance and weight of the dissected guts of foragers,

512 nurses, and winter bees (**Fig. 3A-C**). Strikingly, our experimental colonization of microbiota-  
513 depleted bees with a defined bacterial community showed that pollen in the diet  
514 substantially increases gut weight and bacterial loads to levels comparable to those in  
515 winter bees. In contrast, bacterial levels in bees fed on sugar water only were more similar  
516 to those of foragers (**Fig. 3F-H**). Therefore, we conclude that diet is an important factor that  
517 can explain many of the differences observed between worker bee types. Seasonal changes  
518 in gut microbiota composition in wild rodent populations [52] and humans [53, 54] have  
519 also been found to coincide with dietary shifts, which is in agreement with the general  
520 notion that dietary preferences is the main driver of community differences across a wide  
521 range of animals [55–57].

522 In the case of honey bees, the larger amount of food in the gut is likely to increase the  
523 carrying capacity for the gut microbiota. In addition, pollen is a more nutrient-rich diet than  
524 nectar, honey, or sucrose offering a larger diversity of different metabolic niches for gut  
525 bacteria. Both factors are likely to contribute to the increased bacterial loads in bees fed  
526 on pollen as compared to those fed on sugar water only. Recent reports in mice and fly  
527 models have shown that an increase in nutritional richness, especially protein quantity, is  
528 associated with an increase in overall abundance of the microbiota but a decrease in  $\alpha$ -  
529 diversity [58, 59]. This is supported by our findings, because we observed an increase in  
530 bacterial loads and a decrease in effective number of species in nurses and winter bees  
531 that feed on pollen (**Fig. 2A and 2B**). Consistently, most of the phylotypes that increased in  
532 total abundance (*Lactobacillus Firm5*, *Lactobacillus Firm4*, *Bifidobacterium*, *Bartonella*) are  
533 located in the rectum, which is the last part of the hindgut where pollen accumulates until  
534 bees defecate. In line with this, a previous report showed that the abundances of total



535 bacteria, as well as certain individual phylotypes (*Lactobacillus* Firm-5, *Bifidobacterium*)  
536 increase in rectum upon pollen consumption [60]. However, this increase was dependent  
537 on the age, and it was not significant when autoclaved pollen was used instead of stored  
538 pollen [60]. In contrast to our study, the experimental bees were not inoculated by a  
539 defined bacterial community [60], which may greatly impact community growth and  
540 dynamics. Overall, despite certain experimental differences, our results seem to be  
541 consistent with the data that have been published before.

542

543 However, not all changes observed in winter bees could be recapitulated in our  
544 colonization experiment. For example, the differences observed in *Bartonella* levels  
545 between foragers, nurses, and winter bees (**Fig. 2E**) were not observed in the experimental  
546 bees that were fed with or without pollen (**Fig. 3H**). Another example is *Frischella*. While  
547 this bacterium was less abundant in winter bees than in foragers and nurses, the  
548 colonization success of *Frischella* was largely dependent on the presence of pollen in the  
549 experimental bees. This suggests that other factors may contribute to community  
550 differences found in winter bees as compared to foragers or nurses.

551 Winter bees have an extended lifespan with an average life expectancy of ~6 months as  
552 compared to ~4 weeks in the case of summer bees (i.e. nurses and foragers)[61]. In  
553 contrast, the bees of the colonization experiment were age-matched and sampled ten days  
554 after emergence. In the fruit fly, *Drosophila melanogaster*, the physicochemical state of the  
555 gut changes with age, resulting in shifts in the composition of microbial communities,  
556 mainly characterized by the invasion of certain gut bacterial taxa [62–64]. Therefore, the  
557 observed expansion of *Bartonella* and *Commensalibacter* in the gut of winter bees may be

558 related to age. However, despite their old age, winter bees do not display signs of  
559 senescence [65, 66] and these differences are likely not due to functional decay in intestinal  
560 tissue as reported in flies [64, 67].

561 Winter bees feed on pollen that has been stored in the hive for several weeks to months.  
562 It has previously been shown that the consumption of an aged pollen-diet affects the gut  
563 microbiota composition of nurses [12]. It will be important to characterize metabolic  
564 differences between the pollen diet of winter and summer bees and to associate such  
565 differences with the metabolic capabilities of the different bee microbiota members. For  
566 example, *Commensalibacter* and *Bartonella*, the two community members that increased  
567 the most in winter bees, carry out aerobic respiration, while most of the other microbiota  
568 members are saccharolytic fermenters [22, 68]. Notably, winter bees retain their feces in  
569 the gut for extended periods of time, which is likely to affect the physico-chemical  
570 conditions and the availability of nutrients in the gut. Moreover, in the absence of  
571 defecation, bacteria may accumulate over time in the gut of winter bees, while in nurses  
572 or foragers more frequent defecation may result in a faster turnover of the microbiota.  
573 Together with differences in the body temperature of bees - in winter it is at ~21°C and in  
574 summer at ~35°C [69] - this may influence bacterial growth rates. Indeed, in a recent  
575 metagenomic study, it was shown that gut bacteria have lower average population  
576 replication in old winter bees as compared to young nurse bees, which is indicative of  
577 decreased replication rates [18]. Another important point to consider, when carrying out  
578 non-culture based community analysis is that these methods usually cannot discriminate  
579 between dead and live bacterial cells. Therefore, some of the observed differences could  
580 also be attributed to the accumulation of environmental DNA from lysed bacterial cells.

581 Finally, winter bees show reduced expression of immune genes [70–73], and have an  
582 altered protein metabolism [74] as compared to nurses and foragers, another factor which  
583 may influence the total bacterial loads and the community composition in the gut.

584 In the case of *Frischella*, it is tempting to speculate that the decrease in colonization levels  
585 in old winter bees may be a consequence of the specific immune response elicited by the  
586 host towards this bacterium [10], eliminating it from the gut as the bee ages. In the case of  
587 *Snodgrassella*, it is interesting to note that the levels of *Snodgrassella* barely changed  
588 across worker bee type or the two diet treatments in the experiment. This suggests that  
589 the colonization of *Snodgrassella* is not modulated by the dietary state, the  
590 physicochemical conditions in the gut, or the abundance of other community members. A  
591 possible explanation could be that the niche of *Snodgrassella* is dependent on the host  
592 rather than the diet, because it selectively colonizes the epithelial lining of the ileum, which  
593 presents a physically restricted niche [8, 75, 76].

594

595 Beside the increase of *Commensalibacter* and *Bartonella*, another intriguing characteristic  
596 of the winter bee gut microbiota was the disappearance of minor, non-core community  
597 members in the bee gut microbiota. We can exclude that these differences in community  
598 composition are due to a community sampling bias, because nurses had similar bacterial  
599 loads as winter bees, but showed the opposite trend in respect to the presence of minor  
600 community members. We hypothesize that these minor community members are transient  
601 colonizers that cannot persist in the bee gut environment over longer periods of time and  
602 hence disappear in old winter bees. As some of these bacteria, e.g. *Serratia* or *Klebsiella*,  
603 present potential pathogens of bees, there may be also mechanisms in place that increase

604    colonization resistance against such opportunistic colonizers in winter bees. Moreover,  
605    during the foraging season adult worker bees are more likely to pick up environmental  
606    bacteria from e.g. flowers, facilitating their dissemination in the hive environment during  
607    the summer but not in winter.

608

609    Most of the recent colony losses have occurred during the winter months [33, 34].  
610    Consequently, winter bees are highly critical for colony survival and a better understanding  
611    of the factors influencing their health status - including the gut microbiota - is needed. In  
612    summary, our analysis revealed that the gut microbiota of winter bees undergoes  
613    characteristic shifts. These changes may have important consequences for the host.  
614    Therefore, future studies should specifically focus on the functional role of the gut  
615    microbiota in winter bees, and colony health.

## 616 **Acknowledgements**

617 We would like to thank Paul Reymond, Clément Etter, Katherine Lane for their help  
618 during the sampling of honey bees. We are also grateful to Andrew Quinn and Fabienne  
619 Wichmann for comments on the manuscript. This study was supported by the European  
620 Research Council (ERC-StG 'MicroBeeOme') and the Swiss National Science Foundation  
621 (grant number 31003A\_160345 and 31003A\_179487) received by PE, and a Marie  
622 Skłodowska-Curie Postdoctoral Fellowship (grant agreement ID 797113) to JL. The funder  
623 had no role in study design, data collection and analysis, decision to publish, or  
624 preparation of the manuscript.

## 625 **Competing Interests**

626 Authors declare to have no conflicts of interest.

## 627 **Data accessibility**

628 All scripts and datasets will be deposited to Zenodo upon acceptance. For the revision  
629 they can be found on: <https://drive.switch.ch/index.php/s/zHsqyMOztvAr8Vu>.

630 Sequencing data is deposited on NCBI under BioProject ID PRJNA578869.

## 631 **Supplementary Material**

632 **Supplementary Figures:** Contains Figures S1-S3

633 **Supplementary Table S1:** Primers used in this study and standard curve characteristics.

634 **Supplementary Table S2:** Details of statistics used in Fig 1.

635 **Supplementary Table S3:** Details of statistics used in Fig 2.

- 636 **Supplementary Table S4:** Details of statistics used in Fig 3.
- 637 **Supplementary Table S5:** Details of statistics used in Supplementary Fig S5.
- 638 **Supplementary Table S6:** Data related to the number of reads obtained from 16S rRNA  
639 gene sequencing and after each step of filtration.
- 640 **Supplementary Table S7:** Number of rRNA gene loci for each taxonomic group
- 641

## 642 **References**

- 643 1. Kleiner A-M, Cane James H, Steffan-Dewenter Ingolf, Cunningham Saul A, Kremen Claire,  
644 Tschardtke Teja. Importance of pollinators in changing landscapes for world crops. *Proc R*  
645 *Soc B Biol Sci* 2007; **274**: 303–313.
- 646 2. Barron AB. Death of the bee hive: understanding the failure of an insect society. *Curr Opin*  
647 *Insect Sci* 2015; **10**: 45–50.
- 648 3. Nazi F, Pennacchio F. Disentangling multiple interactions in the hive ecosystem. *Trends*  
649 *Parasitol* 2014; **30**: 556–561.
- 650 4. Goulson D, Nicholls E, Botías C, Rotheray EL. Bee declines driven by combined stress from  
651 parasites, pesticides, and lack of flowers. *Science* 2015; **347**: 1255957.
- 652 5. Raymann K, Moran NA. The role of the gut microbiome in health and disease of adult honey  
653 bee workers. *Curr Opin Insect Sci* 2018.
- 654 6. Kešnerová L, Mars RAT, Ellegaard KM, Troilo M, Sauer U, Engel P. Disentangling metabolic  
655 functions of bacteria in the honey bee gut. *PLOS Biol* 2017; **15**: e2003467.
- 656 7. Engel P, Martinson VG, Moran NA, Moran NA. Functional diversity within the simple gut  
657 microbiota of the honey bee. *Proc Natl Acad Sci* 2012; **109**: 11002–11007.
- 658 8. Zheng H, Powell JE, Steele MI, Dietrich C, Moran NA. Honeybee gut microbiota promotes  
659 host weight gain via bacterial metabolism and hormonal signaling. *Proc Natl Acad Sci* 2017;  
660 **114**: 4775–4780.
- 661 9. Kwong WK, Mancenido AL, Moran NA. Immune system stimulation by the native gut  
662 microbiota of honey bees. *Open Sci* 2017; **4**: 170003.
- 663 10. Emery O, Schmidt K, Engel P. Immune system stimulation by the gut symbiont *Frischella*  
664 *perrara* in the honey bee (*Apis mellifera*). *Mol Ecol* 2017; **26**: 2576–2590.
- 665 11. Raymann K, Shaffer Z, Moran NA. Antibiotic exposure perturbs the gut microbiota and  
666 elevates mortality in honeybees. *PLOS Biol* 2017; **15**: e2001861.

- 667 12. Maes PW, Rodrigues PAP, Oliver R, Mott BM, Anderson KE. Diet-related gut bacterial  
668 dysbiosis correlates with impaired development, increased mortality and Nosema disease in  
669 the honeybee (*Apis mellifera*). *Mol Ecol* 2016; **25**: 5439–5450.
- 670 13. Motta EVS, Raymann K, Moran NA. Glyphosate perturbs the gut microbiota of honey bees.  
671 *Proc Natl Acad Sci* 2018; 201803880.
- 672 14. Blot N, Veillat L, Rouzé R, Delatte H. Glyphosate, but not its metabolite AMPA, alters the  
673 honeybee gut microbiota. *PLOS ONE* 2019; **14**: e0215466.
- 674 15. Kwong WK, Moran NA. Gut microbial communities of social bees. *Nat Rev Microbiol* 2016;  
675 **14**: 374–384.
- 676 16. Moran NA, Hansen AK, Powell JE, Sabree ZL. Distinctive Gut Microbiota of Honey Bees  
677 Assessed Using Deep Sampling from Individual Worker Bees. *PLoS ONE* 2012; **7**: e36393.
- 678 17. Martinson VG, Danforth BN, Minckley RL, Rueppell O, Tingek S, Moran NA. A simple and  
679 distinctive microbiota associated with honey bees and bumble bees. *Mol Ecol* 2011; **20**:  
680 619–628.
- 681 18. Ellegaard KM, Engel P. Genomic diversity landscape of the honey bee gut microbiota. *Nat*  
682 *Commun* 2019; **10**: 446.
- 683 19. D’Alvise P, Böhme F, Codrea MC, Seitz A, Nahnsen S, Binzer M, et al. The impact of winter  
684 feed type on intestinal microbiota and parasites in honey bees. *Apidologie* 2018; **49**: 252–  
685 264.
- 686 20. Corby-Harris V, Maes P, Anderson KE. The Bacterial Communities Associated with Honey Bee  
687 (*Apis mellifera*) Foragers. *PLoS ONE* 2014; **9**: e95056.
- 688 21. Powell JE, Martinson VG, Urban-Mead K, Moran NA. Routes of Acquisition of the Gut  
689 Microbiota of the Honey Bee *Apis mellifera*. *Appl Environ Microbiol* 2014; **80**: 7378–7387.
- 690 22. Kwong WK, Moran NA. Gut microbial communities of social bees. *Nat Rev Microbiol* 2016;  
691 **14**: nrmicro.2016.43.



- 692 23. Corby-Harris V, Maes P, Anderson KE. The Bacterial Communities Associated with Honey Bee  
693 (*Apis mellifera*) Foragers. *PLOS ONE* 2014; **9**: e95056.
- 694 24. Jones JC, Fruciano C, Hildebrand F, Al Toufalilia H, Balfour NJ, Bork P, et al. Gut microbiota  
695 composition is associated with environmental landscape in honey bees. *Ecol Evol* 2017; **8**:  
696 441–451.
- 697 25. Brodschneider R, Crailsheim K. Nutrition and health in honey bees. *Apidologie* . 2010. , 278–  
698 294
- 699 26. Winston M. The biology of the honey bee, Harvard University Press. 1987.
- 700 27. Pavlovsky EN, Zarin EJ. Memoirs: On the Structure of the Alimentary Canal and its Ferments  
701 in the Bee (*Apis mellifera* L.). *Q J Microsc Sci* 1922; **66**: 509–556.
- 702 28. Corby-Harris V, Maes P, Anderson KE. The Bacterial Communities Associated with Honey Bee  
703 (*Apis mellifera*) Foragers. *PLoS ONE* 2014; **9**: e95056.
- 704 29. Rothman JA, Carroll MJ, Meikle WG, Anderson KE, McFrederick QS. Longitudinal Effects of  
705 Supplemental Forage on the Honey Bee (<Emphasis Type="Italic">*Apis*  
706 *mellifera*</Emphasis>) Microbiota and Inter- and Intra-Colony Variability. *Microb Ecol* 2018;  
707 1–11.
- 708 30. Kapheim KM, Rao VD, Yeoman CJ, Wilson BA, White BA, Goldenfeld N, et al. Caste-Specific  
709 Differences in Hindgut Microbial Communities of Honey Bees (*Apis mellifera*). *PLoS ONE*  
710 2015; **10**.
- 711 31. Ludvigsen J. Seasonal trends in the midgut microbiota of honeybees. *88* 2013.
- 712 32. Vandeputte D, Kathagen G, D'hoë K, Vieira-Silva S, Valles-Colomer M, Sabino J, et al.  
713 Quantitative microbiome profiling links gut community variation to microbial load. *Nature*  
714 2017; **551**.
- 715 33. Guzmán-Novoa E, Eccles L, Calvete Y, MCGowan J, Kelly PG, Correa-Benítez A. Varroa  
716 destructor is the main culprit for the death and reduced populations of overwintered honey  
717 bee (*Apis mellifera*) colonies in Ontario, Canada. *Apidologie* 2010; **41**: 443–450.

- 718 34. Genersch E, Ohe W von der, Kaatz H, Schroeder A, Otten C, Büchler R, et al. The German bee  
719 monitoring project: a long term study to understand periodically high winter losses of honey  
720 bee colonies. *Apidologie* 2010; **41**: 332–352.
- 721 35. Engel P, Bartlett KD, Moran NA. The Bacterium *Frischella perrara* Causes Scab Formation in  
722 the Gut of its Honeybee Host. *mBio* 2015; **6**: e00193-15.
- 723 36. Bustin SA, Benes V, Garson JA, Hellemans J, Huggett J, Kubista M, et al. The MIQE  
724 Guidelines: Minimum Information for Publication of Quantitative Real-Time PCR  
725 Experiments. *Clin Chem* 2009; **55**: 611–622.
- 726 37. Pfaffl MW. A new mathematical model for relative quantification in real-time RT–PCR.  
727 *Nucleic Acids Res* 2001; **29**: e45–e45.
- 728 38. Gallup JM. qPCR Inhibition and Amplification of Difficult Templates. *PCR Troubleshooting*  
729 *and Optimization: The Essential Guide*. 2011. Horizon Scientific Press, pp 23–65.
- 730 39. Caporaso JG, Lauber CL, Walters WA, Berg-Lyons D, Lozupone CA, Turnbaugh PJ, et al. Global  
731 patterns of 16S rRNA diversity at a depth of millions of sequences per sample. *Proc Natl*  
732 *Acad Sci* 2011; **108**: 4516–4522.
- 733 40. Callahan BJ, McMurdie PJ, Rosen MJ, Han AW, Johnson AJA, Holmes SP. DADA2: High-  
734 resolution sample inference from Illumina amplicon data. *Nat Methods* 2016; **13**: 581–583.
- 735 41. McMurdie PJ, Holmes S. phyloseq: An R Package for Reproducible Interactive Analysis and  
736 Graphics of Microbiome Census Data. *PLOS ONE* 2013; **8**: e61217.
- 737 42. Gentleman R, Carey V, Huber W, Hahne F. Genefilter: methods for filtering genes from high-  
738 throughput experiments. R package version 1.66.0.  
739 <https://bioconductor.org/packages/release/bioc/html/genefilter.html> 2019.
- 740 43. Oksanen J, Blanchett FG, Friendly M, Kindt R, Legendre P, McGlinn D, et al. vegan:  
741 Community Ecology Package. R package version 2.5-3. 2018.
- 742 44. Lou Jost. Entropy and diversity. *Oikos* 2006; **113**: 363–375.

- 743 45. Bray JR, Curtis JT. An Ordination of the Upland Forest Communities of Southern Wisconsin.  
744 *Ecol Monogr* 1957; **27**: 325–349.
- 745 46. Anderson MJ, Ellingsen KE, McArdle BH. Multivariate dispersion as a measure of beta  
746 diversity. *Ecol Lett* 2006; **9**: 683–693.
- 747 47. Anderson MJ. Distance-Based Tests for Homogeneity of Multivariate Dispersions. *Biometrics*  
748 2006; **62**: 245–253.
- 749 48. Lavanchy G, Strehler M, Llanos Roman MN, Lessard-Therrien M, Humbert J, Dumas Z, et al.  
750 Habitat heterogeneity favors asexual reproduction in natural populations of grasshoppers. *Evol*  
751 *Int J Org Evol* 2016; **70**: 1780–1790.
- 752 49. Hothorn T, Bretz F, Westfall P. Simultaneous Inference in General Parametric Models. *Biom J*  
753 2008; **50**: 346–363.
- 754 50. Hammer TJ, Janzen DH, Hallwachs W, Jaffe SP, Fierer N. Caterpillars lack a resident gut  
755 microbiome. *Proc Natl Acad Sci* 2017; **114**: 9641–9646.
- 756 51. Anderson KE, Carroll MJ, Sheehan T, Mott BM, Maes P, Corby-Harris V. Hive-stored pollen of  
757 honey bees: many lines of evidence are consistent with pollen preservation, not nutrient  
758 conversion. *Mol Ecol* 2014; **23**: 5904–5917.
- 759 52. Maurice CF, CL Knowles S, Ladau J, Pollard KS, Fenton A, Pedersen AB, et al. Marked  
760 seasonal variation in the wild mouse gut microbiota. *ISME J* 2015; **9**: 2423–2434.
- 761 53. Davenport ER, Mizrahi-Man O, Michelini K, Barreiro LB, Ober C, Gilad Y. Seasonal Variation  
762 in Human Gut Microbiome Composition. *PLoS ONE* 2014; **9**: e90731.
- 763 54. Smits SA, Leach J, Sonnenburg ED, Gonzalez CG, Lichtman JS, Reid G, et al. Seasonal cycling  
764 in the gut microbiome of the Hadza hunter-gatherers of Tanzania. *Science* 2017; **357**: 802–  
765 806.
- 766 55. Sonnenburg ED, Smits SA, Tikhonov M, Higginbottom SK, Wingreen NS, Sonnenburg JL. Diet-  
767 induced extinctions in the gut microbiota compound over generations. *Nature* 2016; **529**:  
768 212–215.

- 769 56. Muegge BD, Kuczynski J, Knights D, Clemente JC, González A, Fontana L, et al. Diet Drives  
770 Convergence in Gut Microbiome Functions Across Mammalian Phylogeny and Within  
771 Humans. *Science* 2011; **332**: 970–974.
- 772 57. Sommer F, Ståhlman M, Ilkayeva O, Arnemo JM, Kindberg J, Josefsson J, et al. The Gut  
773 Microbiota Modulates Energy Metabolism in the Hibernating Brown Bear *Ursus arctos*. *Cell*  
774 *Rep* 2016; **14**: 1655–1661.
- 775 58. Erkosar B, Yashiro E, Zajitschek F, Friberg U, Maklakov AA, Meer JR van der, et al. Host diet  
776 mediates a negative relationship between abundance and diversity of *Drosophila* gut  
777 microbiota. *Ecol Evol* 2018; **8**: 9491–9502.
- 778 59. Llewellyn SR, Britton GJ, Contijoch EJ, Vennaro OH, Mortha A, Colombel J-F, et al.  
779 Interactions Between Diet and the Intestinal Microbiota Alter Intestinal Permeability and  
780 Colitis Severity in Mice. *Gastroenterology* 2018; **154**: 1037-1046.e2.
- 781 60. Ricigliano VA, Fitz W, Copeland DC, Mott BM, Maes P, Floyd AS, et al. The impact of pollen  
782 consumption on honey bee (*Apis mellifera*) digestive physiology and carbohydrate  
783 metabolism. *Arch Insect Biochem Physiol* 2017; **96**: e21406.
- 784 61. Omholt SW, Amdam GV. Epigenetic Regulation of Aging in Honeybee Workers. *Sci Aging*  
785 *Knowl Environ* 2004; **2004**: pe28.
- 786 62. Li H, Qi Y, Jasper H. Preventing Age-Related Decline of Gut Compartmentalization Limits  
787 Microbiota Dysbiosis and Extends Lifespan. *Cell Host Microbe* 2016; **19**: 240–253.
- 788 63. Broderick NA, Buchon N, Lemaitre B. Microbiota-Induced Changes in *Drosophila*  
789 *melanogaster* Host Gene Expression and Gut Morphology. *mBio* 2014; **5**: e01117-14.
- 790 64. Clark RI, Salazar A, Yamada R, Fitz-Gibbon S, Morselli M, Alcaraz J, et al. Distinct Shifts in  
791 Microbiota Composition during *Drosophila* Aging Impair Intestinal Function and Drive  
792 Mortality. *Cell Rep* 2015; **12**: 1656–1667.
- 793 65. Münch D, Amdam GV. The curious case of aging plasticity in honey bees. *FEBS Lett* 2010;  
794 **584**: 2496–2503.

- 795 66. Münch D, Kreibich CD, Amdam GV. Aging and its modulation in a long-lived worker caste of  
796 the honey bee. *J Exp Biol* 2013; **216**: 1638–1649.
- 797 67. Guo J, Wu J, Chen Y, Evans JD, Dai R, Luo W, et al. Characterization of gut bacteria at  
798 different developmental stages of Asian honey bees, *Apis cerana*. *J Invertebr Pathol* 2015;  
799 **127**: 110–114.
- 800 68. Bonilla-Rosso G, Engel P. Functional roles and metabolic niches in the honey bee gut  
801 microbiota. *Curr Opin Microbiol* 2018; **43**: 69–76.
- 802 69. Fahrenholz L, Lamprecht I, Schrickler B. Thermal investigations of a honey bee colony:  
803 thermoregulation of the hive during summer and winter and heat production of members of  
804 different bee castes. *J Comp Physiol B* 1989; **159**: 551–560.
- 805 70. Gätschenberger H, Azzami K, Tautz J, Beier H. Antibacterial Immune Competence of Honey  
806 Bees (*Apis mellifera*) Is Adapted to Different Life Stages and Environmental Risks. *PLOS ONE*  
807 2013; **8**: e66415.
- 808 71. Hystad EM, Salmela H, Amdam GV, Münch D. Hemocyte-mediated phagocytosis differs  
809 between honey bee (*Apis mellifera*) worker castes. *PLOS ONE* 2017; **12**: e0184108.
- 810 72. Cristian R, Neagu A, Mihalache, Lazar V, Ecovoiu A. Molecular and bioinformatics analysis of  
811 the relative expression profiles of dorsal, Toll-1, Relish and Duox genes in young versus old  
812 diutinus workers of *Apis mellifera*. 2016.
- 813 73. Steinmann N, Corona M, Neumann P, Dainat B. Overwintering Is Associated with Reduced  
814 Expression of Immune Genes and Higher Susceptibility to Virus Infection in Honey Bees.  
815 *PLOS ONE* 2015; **10**: e0129956.
- 816 74. Crailsheim K. Dependence of protein metabolism on age and season in the honeybee (*Apis*  
817 *mellifica carnica* Pollm). *J Insect Physiol* 1986; **32**: 629–634.
- 818 75. Kwong WK, Moran NA. Cultivation and characterization of the gut symbionts of honey bees  
819 and bumble bees: description of *Snodgrassella alvi* gen. nov., sp. nov., a member of the  
820 family Neisseriaceae of the Betaproteobacteria, and *Gilliamella apicola* gen. nov., sp. nov., a

821 member of Orbaceae fam. nov., Orbales ord. nov., a sister taxon to the order  
822 'Enterobacteriales' of the Gammaproteobacteria. *Int J Syst Evol Microbiol* 2013; **63**: 2008–  
823 2018.

824 76. Martinson VG, Moy J, Moran NA. Establishment of Characteristic Gut Bacteria during  
825 Development of the Honeybee Worker. *Appl Environ Microbiol* 2012; **78**: 2830–2840.

826

827

828 **Figures**

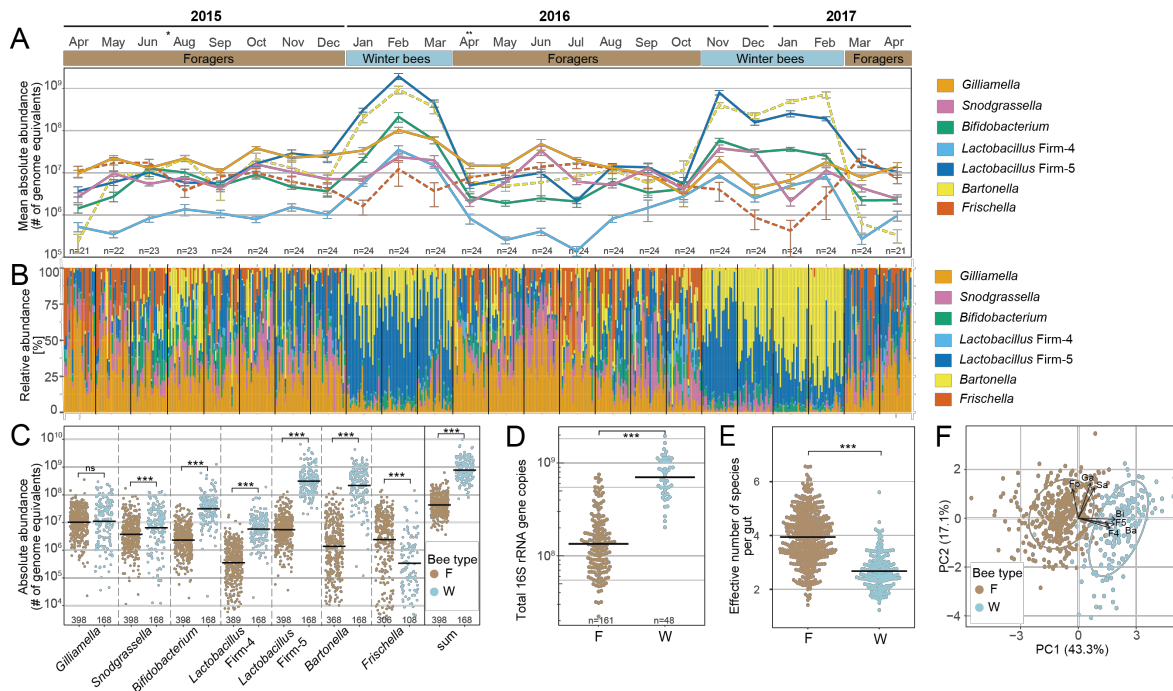

829

830 **Fig. 1. Gut bacterial communities differ between foraging and winter season in a single**  
 831 **colony monitored over two years. (A)** Monthly changes in the absolute abundance  
 832 assessed by qPCR, as determined by number of genome equivalents per sample, of seven  
 833 phylotypes monitored over a period of two years, depicted as mean values ( $\pm$ SE) of the  
 834 analyzed bees. The number of bees per month is indicated at the bottom of the plot. \*  
 835 indicates missing data for July 2015 due to DNA extraction failure. \*\* indicates that the  
 836 queen of the colony was replaced in the corresponding month. **(B)** Relative community  
 837 composition of the gut microbiota of bees sampled in each month as based on the seven  
 838 monitored phylotypes. **(C)** Absolute bacterial abundance of each phylotype per gut in  
 839 foragers (F) and winter bees (W), as determined by the number of genome equivalents.  
 840 The sum of the abundances of the seven monitored phylotypes is also plotted. Mean values  
 841 are shown as black horizontal lines. Only bees with detectable levels were plotted (the  
 842 number of bees is given at the bottom of the plot; for prevalence see **Supplementary Fig.**

843 **S1). (D)** Copy number of the 16S rRNA gene in gut samples of a subset of the analyzed  
844 months (Apr 2015, Aug 2015, Oct 2015, Jan 2016, Apr 2016, Jul 2016, Oct 2016, Jan 2017,  
845 Apr 2017). **(E)** Effective number of species calculated from cell numbers of different  
846 bacterial phylotypes in foragers (F) and winter bees (W). **(F)** Projection of the abundances  
847 of monitored phylotypes into first and second principal components in all analyzed bees,  
848 together with correlation vectors representing variables driving the separation on both  
849 axes. Permutation T-Test was used for pairwise comparisons. ns, non-significant; \*\*\*,  $P <$   
850 0.001.

851

852



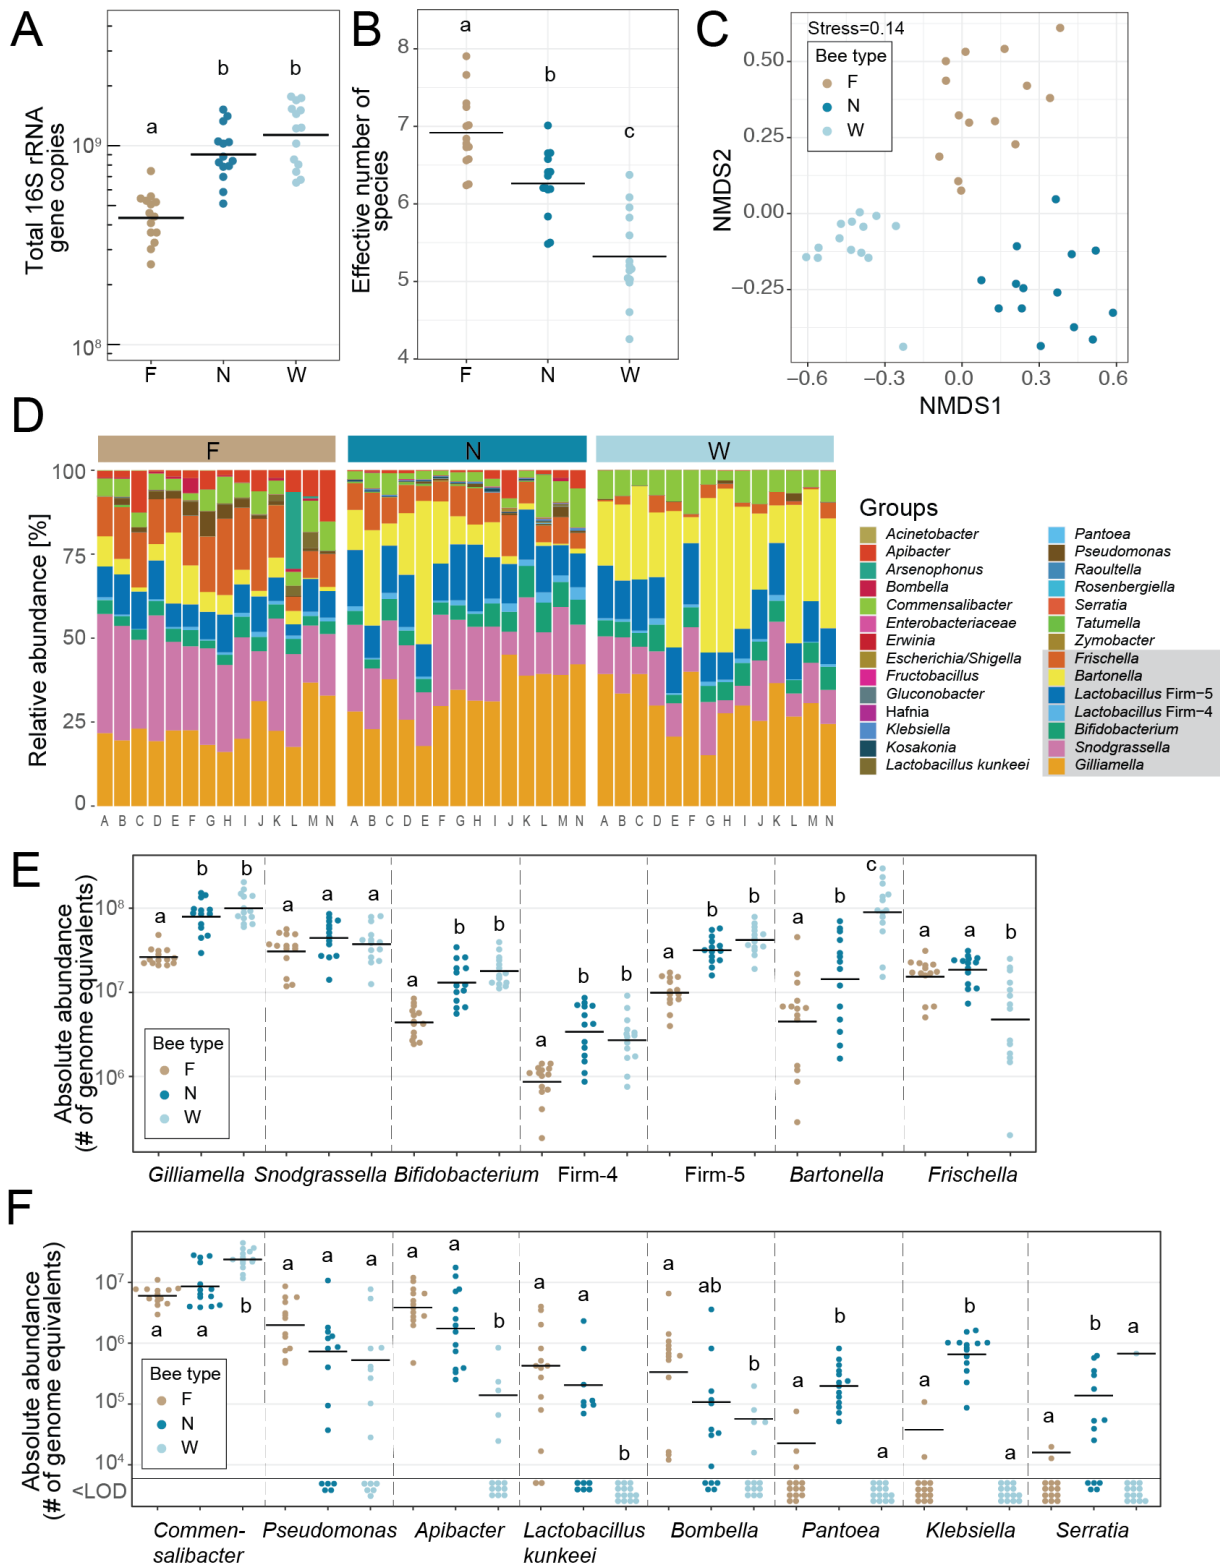

853

854 **Figure 2. Bacterial load and community composition differ between foragers, nurses, and**

855 **winter bees across 14 colonies. (A) Average 16S rRNA gene copy number per gut in**

856 foragers, nurses, and winter bees as determined from the pooled gut samples from the 14  
857 different colonies. **(B)** Differences in  $\alpha$ -diversity, i.e. effective number of species, in the gut  
858 microbiota of foragers, nurses, and winter bees based on 16S rRNA gene amplicon  
859 sequencing. **(C)** NMDS based on Bray-Curtis dissimilarities on the gut communities of  
860 foragers, nurses, and winter bees based on 16S rRNA gene amplicon sequencing. **(D)**  
861 Relative community composition of the gut microbiota based on 16S rRNA gene amplicon  
862 sequencing. The seven phylotypes monitored by qPCR (see **Fig. 1** and **Supplementary Fig.**  
863 **S4**) which make up the vast majority of the community are highlighted by a grey box in the  
864 legend. Capital letters below the stacked bars indicate the hive of origin. **(E)** Absolute  
865 abundance of each of the seven major phylotype in foragers (F), nurses (N), and winter  
866 bees (W) across hives, as determined based on the number of genome equivalents per gut  
867 calculated by multiplying the relative abundance of each phylotype by the total 16S rRNA  
868 gene copy number. **(F)** Absolute abundance of a subset of the minor community members  
869 in foragers (F), nurses (N), and winter bees (W) across hives, as determined based on the  
870 number of genome equivalents per gut calculated by multiplying the relative abundance of  
871 each phylotype by the total 16S rRNA gene copy number. <LOD, below limit of detection of  
872 the 16S rRNA amplicon sequencing, i.e. no reads were obtained for that particular taxa in  
873 the respective sample. Absolute abundance of the remaining phylotypes are depicted in  
874 **Supplementary Fig. S4B**. In panels A, B, E and F, levels (bee types) not connected by the  
875 same letter are significantly different as based on ANOVA followed by Tukey's HSD test (see  
876 **Supplementary Table S3**).  
877

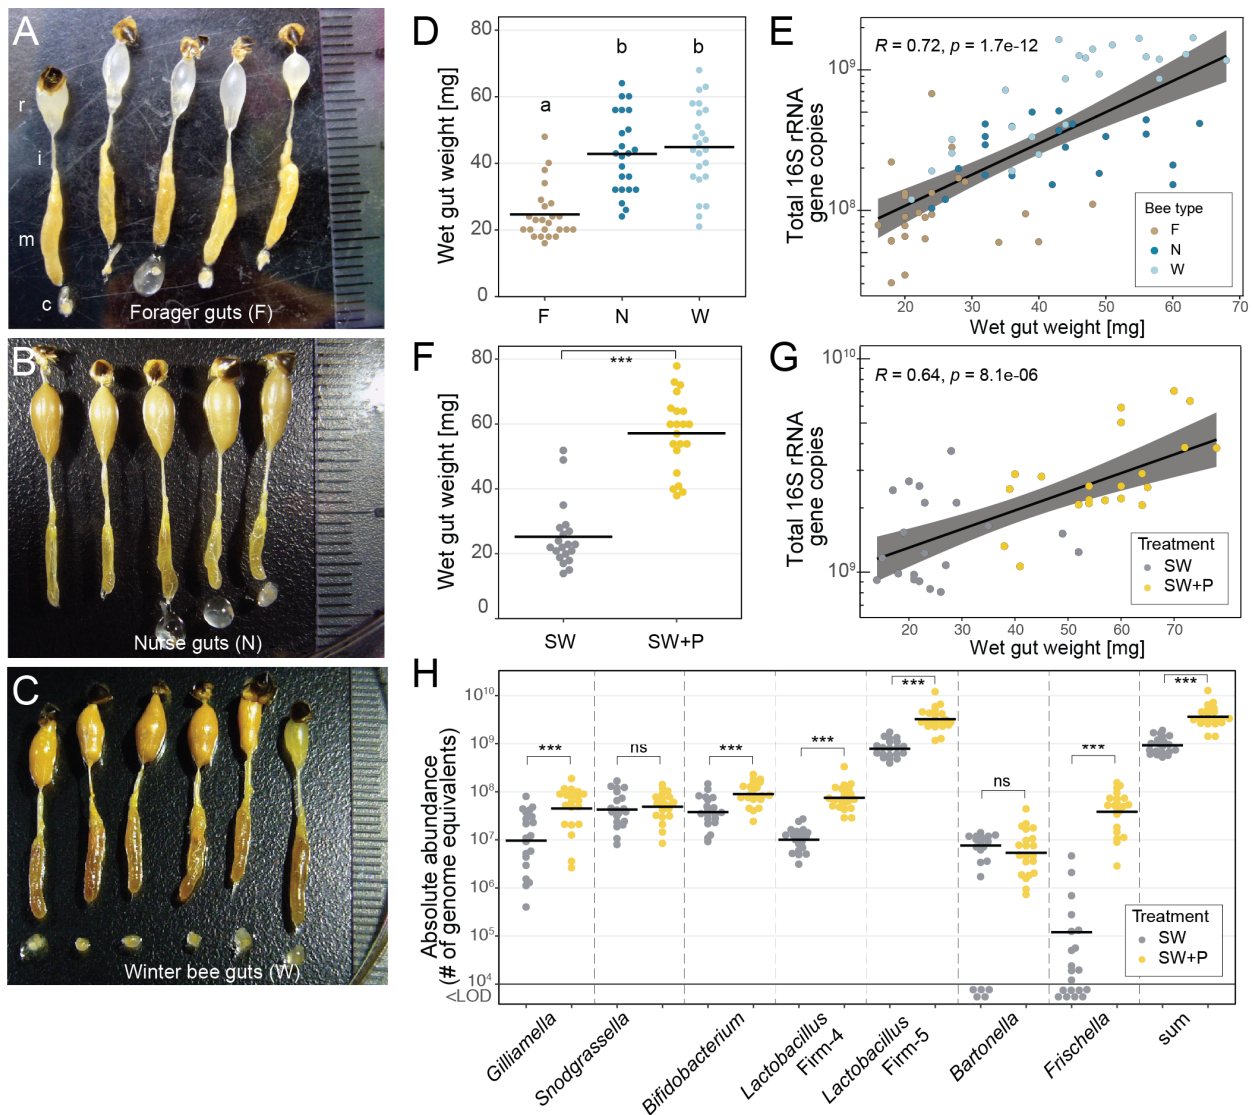

878

879 **Figure 3. Diet is a major factor shaping the gut microbiota of honey bees. (A-C)** Dissected

880 guts of foragers **(A)**, nurses **(B)**, and winter bees **(C)** consisting of the crop (c) (missing in

881 some samples), the midgut (m), the ileum (i), and the rectum (r) with attached stinger and

882 last abdominal tergite. **(D)** Wet gut weight of individual foragers (F), nurses (N), and winter

883 bees (W). Different letters indicate groups that are significantly different from each other

884 based on ANOVA followed by Tukey's HSD test (See Supplementary Table S4 for details).

885 **(E)** Spearman correlation between gut weight and bacterial loads (assessed with universal

886 bacterial 16S rRNA primers) across all bee types. The grey area indicates the 95%

887 confidence interval. **(F)** Wet gut weight of experimentally colonized bees that were fed  
888 either sugar water (SW) or sugar water and pollen (SW+P). **(G)** Spearman correlation  
889 between gut weight and bacterial loads (assessed with universal bacterial 16S rRNA gene  
890 primers) across the two treatment groups of colonized bees. **(H)** Total abundances of the  
891 seven monitored phylotypes in the two treatment groups of colonized bees, as determined  
892 by genome equivalents per gut using phylotype-specific qPCR primers. The sum of the  
893 abundances of the seven monitored phylotypes is also depicted. Bees with bacterial loads  
894 below the limit of detection (<LOD) of the qPCR method are shown below the cut of the  
895 axis at  $10^4$ . Two-group comparisons were done by Permutation T-Test. ns, non-significant;  
896 \*\*\*,  $P < 0.001$ .
